# Supplementary material
Source: PubMed Central journal article supplement (PMC4577386)
Supplement: supp_pp.15.00355_00355R2_Supplemental_tables.pdf [file supp_pp.15.00355_00355R2_Supplemental_tables.pdf]

1 **Table S1.** Primers used for gene cloning and vector construction.

| Primer name   | Sequence (5→3')                         | Restriction sites             |
|---------------|-----------------------------------------|-------------------------------|
| BaitF         | AGGGGATCCTTATGCTGAAAAAGAAAAC            | <i>Bam</i> H I                |
| BaitR         | ACAGTCGACCGTGATTATGCTTGCCTG             | <i>Sal</i> I                  |
| GR            | ACAGTCGACCATATGCTGAGACTCTTG             | <i>Sal</i> I                  |
| HR            | ACAGTCGACTGGCCGAGTTGAAACCC              | <i>Sal</i> I                  |
| HF            | AGAGGATCCAAGCTAGGAATGCATTTC             | <i>Bam</i> H I                |
| RF            | AGAGGATCCGGGTTAATGTTCTCTTAG             | <i>Bam</i> H I                |
| TNTK1F        | GCACTCGAGATGCTGAAAAAGAAAACCTGG          | <i>Xho</i> I                  |
| TNTK1R        | CGAGTCGACTTACGTGATTATGCTTGCCTG          | <i>Sal</i> I                  |
| TNTGR         | ACAGTCGACTTACATATGCTGAGACTCTTC          | <i>Sal</i> I                  |
| TNTHR         | ACAGTCGACTTATGGCCGAGTTGAAACCC           | <i>Sal</i> I                  |
| TNTHF         | GACCTCGAGATGCAAGCTAGGAATGCATTTC         | <i>Xho</i> I                  |
| TNTRF         | GACCTCGAGATGGGGGTTAATGTTCTCTTA          | <i>Xho</i> I                  |
| NtTCTP-GWF1   | ATGTTGGTTTATCAGGATCTTCTC                |                               |
| NtTCTP-GWR1   | ACACTTGACCTCCTTGAGTCCAT                 |                               |
| NTHK1-GWF1    | ATGTTAAGGACATTAGCATTAGCT                |                               |
| NTHK1-GWR1    | CGTGATTATGCTTGCCTGTAG                   |                               |
| NTHK1-BiFCF1  | CCGCTCGAGGGATCCATGTTAAGGACATTAGCATTAGCT | <i>Xho</i> I + <i>Bam</i> H I |
| NTHK1-BiFCR1  | ACGCGTCGACCGTGATTATGCTTGCCTGTAG         | <i>Sal</i> I                  |
| NtTCTP-BiFCF1 | CCGCTCGAGGGATCCATGTTGGTTTATCAGGATCTTCTC | <i>Xho</i> I + <i>Bam</i> H I |
| NtTCTP-BiFCR1 | ACGCGTCGACACACTTGACCTCCTTGAGTCCAT       | <i>Sal</i> I                  |
| NTHK1-BiFCF2  | CGCGGATCCATGTTAAGGACATTAGCATTAGCT       | <i>Bam</i> H I                |
| NTHK1-BiFCR2  | CGGGGTACCTCACGTGATTATGCTTGCCTGTAG       | <i>Kpn</i> I                  |
| NtTCTP-BiFCF2 | CGCGGATCCATGTTGGTTTATCAGGATCTTCTC       | <i>Bam</i> H I                |
| NtTCTP-BiFCR2 | CGGGGTACCTTAACACTTGACCTCCTTGAGTCCAT     | <i>Kpn</i> I                  |
| NtTCTPRIF     | TGCTCTAGAGAGCTCATGTTGGTTTATCAGGATCTTCTC | <i>Xba</i> I + <i>Sac</i> I   |
| NtTCTPRIR     | ACGCGTCGACGGTACCACACTTGACCTCCTTGAGTCC   | <i>Sal</i> I + <i>Kpn</i> I   |
| NTHK1F1-RNAi  | GCTCTAGAGAGCTCGGTTGAGAAGACCCATGCACT     | <i>Xba</i> I + <i>Sac</i> I   |
| NTHK1R1-RNAi  | CGGTTCGACGGTACCATGCCCTCTGGCTGAGAATG     | <i>Sal</i> I + <i>Kpn</i> I   |
| NTHK1F2-RNAi  | GCTCTAGAGAGCTCCACTCGCATCCACACTCACT      | <i>Xba</i> I + <i>Sac</i> I   |
| NTHK1R2-RNAi  | CGGTTCGACGGTACCAGCGGTTGGTCTAAGCAAT      | <i>Sal</i> I + <i>Kpn</i> I   |

2 **Table S2.** Primers used for qRT-PCR analysis.

| Primer name   | Sequence (5→3')             | Gene                        | Accession number          |
|---------------|-----------------------------|-----------------------------|---------------------------|
| QRT-NtTCTP1F1 | CAGGGAGCTGTTGATGTGAACAT     | <i>NtTCTP</i>               | KM507327                  |
| QRT-NtTCTP1R1 | TGCTCCTGAAGCCTGAAAGTGT      |                             |                           |
| QRT-NtTCTPLF  | GAGAGCATGCATGACGATGG        | <i>NtTCTPL</i> <sup>a</sup> | gene_60507,<br>gene_60645 |
| QRT-NtTCTPLR  | GCTCAAAATCTCCACCAGACATC     |                             |                           |
| QRT-NTHK1F1   | CTGGCCATTGATCGTTGGTT        | <i>NTHK1</i>                | AF026267                  |
| QRT-NTHK1R1   | GCAGTAGCACCGGCTTACGAAT      |                             |                           |
| QRT-NtACS2F2  | GGACGATGAAACAATGAGAACTGC    | <i>NtACS2</i>               | EU123522                  |
| QRT-NtACS2R2  | TTCATTGGAGAGTGAAGTGGTG      |                             |                           |
| QRT-NtACS4F1  | GCCTGGATCATCATGCCATTGT      | <i>NtACS4</i>               | EU123523.1                |
| QRT-NtACS4R1  | CGTCGCATGGCGAGGTTTAGT       |                             |                           |
| QRT-NtEFEF1   | CACCATGCCAAAACCAGATT        | <i>NtEFE1</i>               | Z29529                    |
| QRT-NtEFER1   | GATCGCCAAGGTTAACGACGAT      |                             |                           |
| QRT-NtACO2F1  | AGACGGGACTCGGATGTCATT       | <i>NtAOC2</i>               | Z46349                    |
| QRT-NtACO2R1  | CCTTGGCTCTTTGGCTTGAAACT     |                             |                           |
| QRT-NtACO3F1  | GCTCAGCCTGATGGAAACAGAAT     | <i>NtACO3</i>               | X83229                    |
| QRT-NtACO3R1  | CCTTGGCTCCTTAGCCTGGAAT      |                             |                           |
| QRT-NtEIN3F1  | CCTCACACTTTCAGGAGCTT        | <i>NtEIN3</i>               | AF247568                  |
| QRT-NtEIN3R1  | TAAGGCGGAGGACCTTGATCT       |                             |                           |
| QRT-NtEIL1F1  | CCAAGAGGGAAGATCTACACATTATCG | <i>NtEIL1</i>               | AY248903                  |
| QRT-NtEIL1R1  | CCATGCAGAATCCTCCAACCT       |                             |                           |
| QRT-NtEIL2F1  | GATATTCGCCATGCTGGCTGGTT     | <i>NtEIL2</i>               | AY248904                  |
| QRT-NtEIL2R1  | CCGAATCATCGACGAAGTACAGT     |                             |                           |
| QRT-NtEIL3F1  | CAATGCAGGCCCTAATGACAAT      | <i>NtEIL3</i>               | AY248905                  |
| QRT-NtEIL3R1  | CTTGCTTCGGTGTGGTATCGTAT     |                             |                           |
| QRT-NtEIL4F1  | CCAACTACTGGCAATTTACCTG      | <i>NtEIL4</i>               | AY248906                  |
| QRT-NtEIL4R1  | GTCTATGACGCCAAAGCTGC        |                             |                           |
| QRT-NtEIL5F1  | ACTCTGCTCAACGACTTGGCAT      | <i>NtEIL5</i>               | AY248907                  |
| QRT-NtEIL5R1  | CGACGAGGAAGCTGTGACTGAT      |                             |                           |
| QRT-NtERF1F1  | GAGCTAGGGTTTGGCTTGAACAT     | <i>NtERF1</i>               | D38123.1                  |
| QRT-NtERF1R1  | ACTAGCCGGTTCAGGCGATGCT      |                             |                           |
| QRT-NttubA1F1 | ACCAGTGTGCTGAGGTCTTCT       | <i>NttubA1</i>              | AJ421411                  |
| QRT-NttubA1R  | GCACCAACTTCTCGTAATCCT       |                             |                           |

3 <sup>a</sup> *NtTCTPL* sequences are from the Ntab-BX\_AWOK-SS\_Basma.proteins.faa database on sol genomics network

4 (<http://solgenomics.net/>)
